# Supplementary material for: Temozolomide suppresses MYC via activation of TAp63 to inhibit progression of human glioblastoma
Source: PubMed Central journal article supplement — Sci Rep. 2013 Jan 29;3:1160. doi: 10.1038/srep01160 (PMC3557454; doi:10.1038/srep01160), 2013-01-29
Supplement: srep01160-s1.pdf [file srep01160-s1.pdf]

## Supplementary Information

**Temozolomide suppresses *MYC* via activation of TAp63 to inhibit progression of human glioblastoma**

Tomohiro Yamaki, Yusuke Suenaga, Toshihiko Iuchi, Jennifer Alagu, Atsushi Takatori, Makiko Itami, Akinobu Araki, Miki Ohira, Masahiro Inoue, Hajime Kageyama, Sana Yokoi, Naokatsu Saeki & Akira Nakagawara

**Supplementary Table 1**

Summary of available RNA data derived from 69 newly-diagnosed malignant glioma patients.

| <b>Classification</b>                            | <b><i>n</i></b> | <b>(%)</b> |
|--------------------------------------------------|-----------------|------------|
| <b>All patients</b>                              | 69              |            |
| <b>Average age (years <math>\pm</math> s.d.)</b> | 59.2 $\pm$ 12.6 |            |
| <b>Sex</b>                                       |                 |            |
| Female                                           | 29              | 42         |
| Male                                             | 40              | 58         |
| <b>Diagnosis</b>                                 |                 |            |
| Glioblastoma                                     | 59              | 85.5       |
| Anaplastic astrocytoma                           | 7               | 10.1       |
| Anaplastic oligoastrocytoma                      | 3               | 4.4        |
| <b><i>MGMT</i> promoter status</b>               |                 |            |
| Methylated                                       | 17              | 24.6       |
| Methylated/unmethylated                          | 11              | 15.9       |
| Unmethylated                                     | 34              | 49.3       |
| Not available                                    | 7               | 10.2       |
| <b>Temozolomide treatment</b>                    |                 |            |
| Yes (2006 – 2011)                                | 20              | 29         |
| No (1994 – 2007)                                 | 49              | 71         |

## Supplementary Figure 1

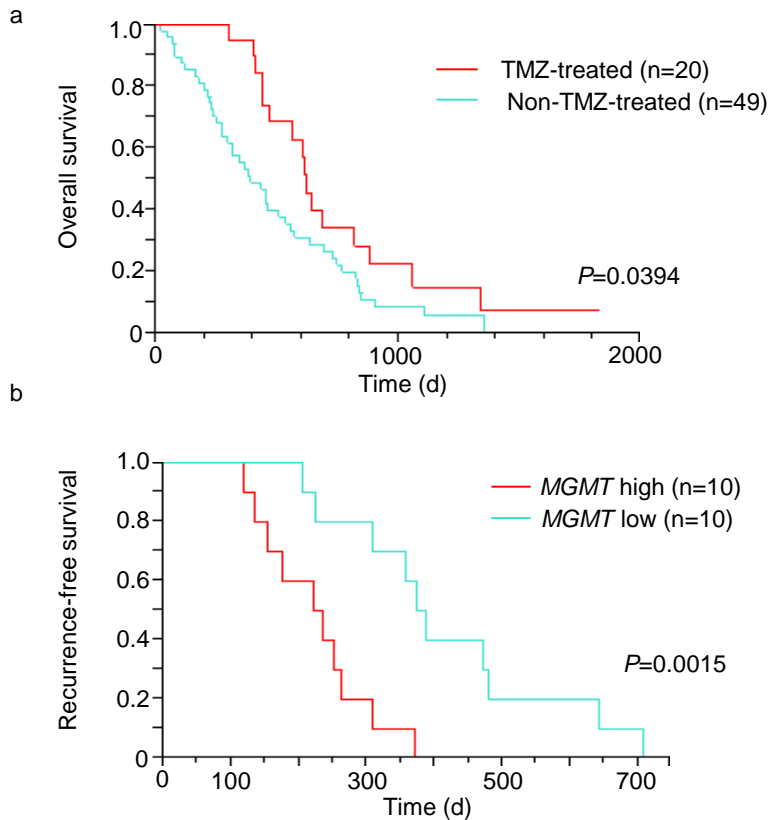

## Supplementary Figure 1

TMZ treatment and low *MGMT* mRNA expression are associated with favorable prognosis in malignant glioma .

a) Kaplan–Meier survival curves of overall survival. Subgroups of TMZ-treated (n=20) and non-TMZ-treated (n=49) patients among 69 individual samples of newly diagnosed malignant gliomas (GBM, 59; anaplastic astrocytoma, 7; anaplastic oligoastrocytoma, 3).  $P$  value by log-rank test.

b) Kaplan–Meier survival curves of recurrence-free survival of 20 malignant glioma patients (GBM, 17; anaplastic oligoastrocytoma, 3) according to tumor sample *MGMT* mRNA expression from patients who were TMZ-treated after resection. *MGMT* expression was normalized by *ACTB*, and then designated high (n=10) or low (n=10) according to the median value. High: n=10, mean *MGMT* expression =  $15.46 \pm 2.45$  s.d. Low: n=10, mean *MGMT* expression =  $5.45 \pm 0.70$  s.d.  $P$  value by log-rank test.

## Supplementary Figure 2

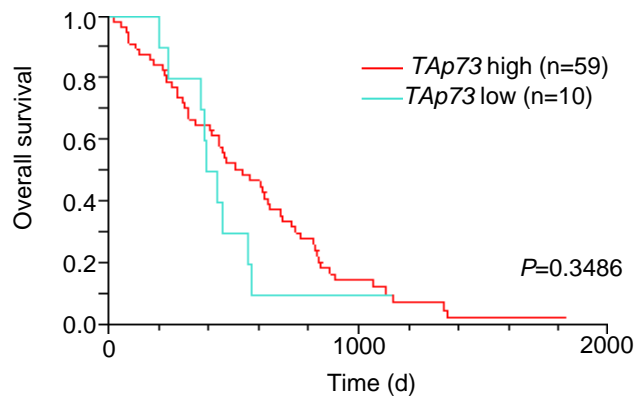

## Supplementary Figure 2

Kaplan–Meier survival curves of overall survival time in subjects with newly diagnosed malignant gliomas according to the relative expression levels of *TAp73* before chemotherapy (n=69). *TAp73* was normalized to *ACTB*, and then designated high or low based on the normal human brain expression. High: n=59, mean *TAp73* expression =  $0.93 \pm 0.17$  s.d. Low: n=10, mean *TAp73* expression =  $0.01 \pm 0.002$  s.d. *P* value by log-rank test.

### Supplementary Figure 3

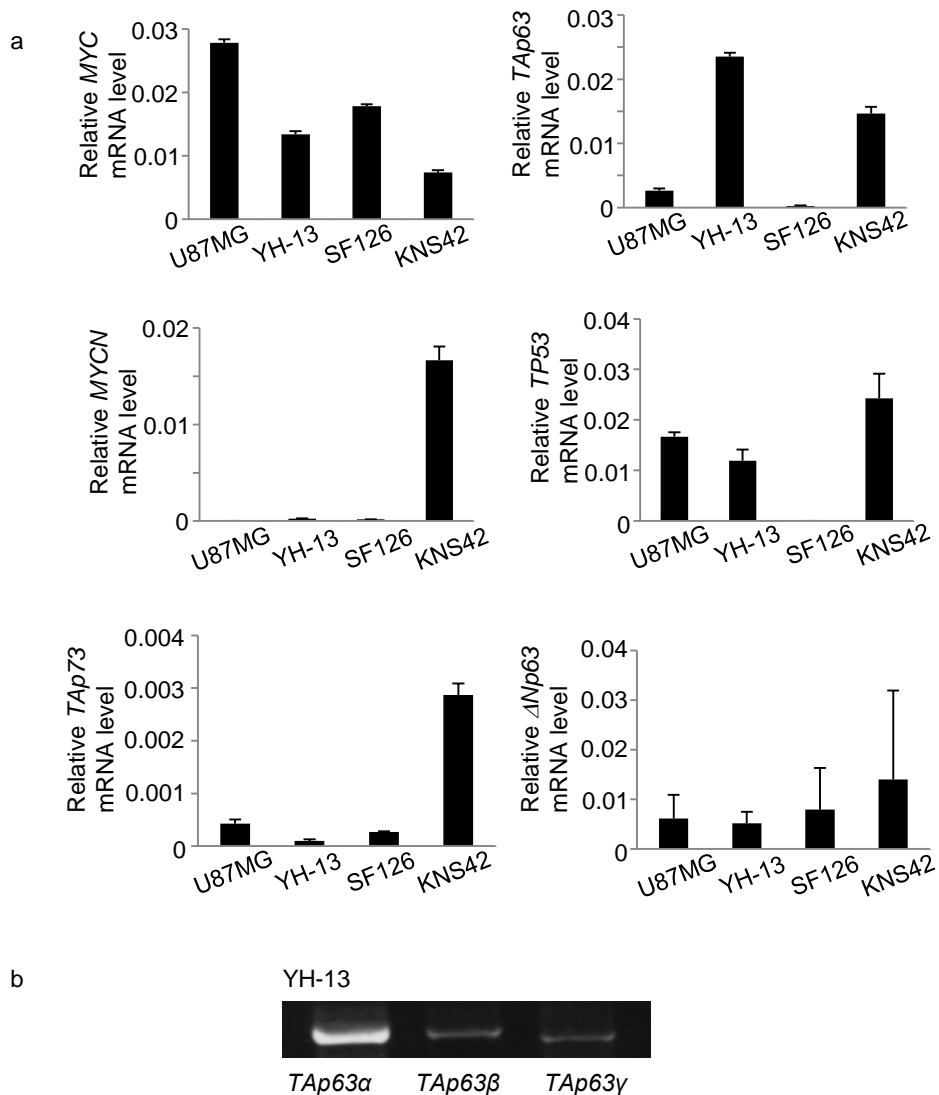

### Supplementary Figure 3

Basal mRNA expression levels of p53 and Myc family members in 4 GBM cell lines.

a) qRT-PCR analyses of the relative steady-state mRNA expression of p53 family members (*TP53*, *TAp63*,  $\Delta$ *Np63* and *TAp73*) and Myc family members (*MYC*, *MYCN*) in GBM cell lines (U87MG, YH-13, SF126 and KNS42), normalized by *ACTB*.

b) RT-PCR analysis of *TAp63* isoforms  $\alpha$ ,  $\beta$  and  $\gamma$  in YH-13 cells.

### Supplementary Figure 4

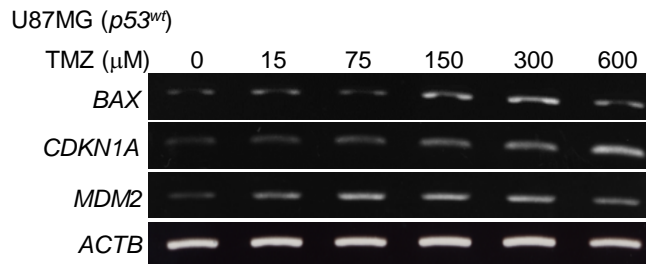

### Supplementary Figure 4

RT-PCR analyses of p53 downstream target genes (*BAX*, *CDKN1A* and *MDM2*) in a TMZ-dependent manner.

## Supplementary Figure 5

a

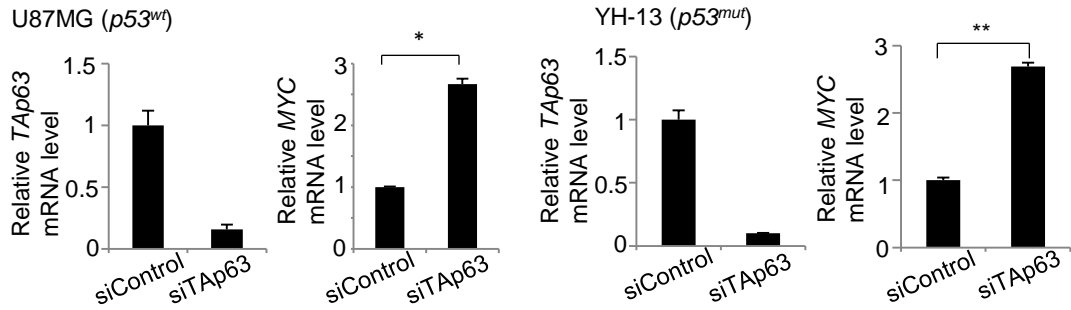

b

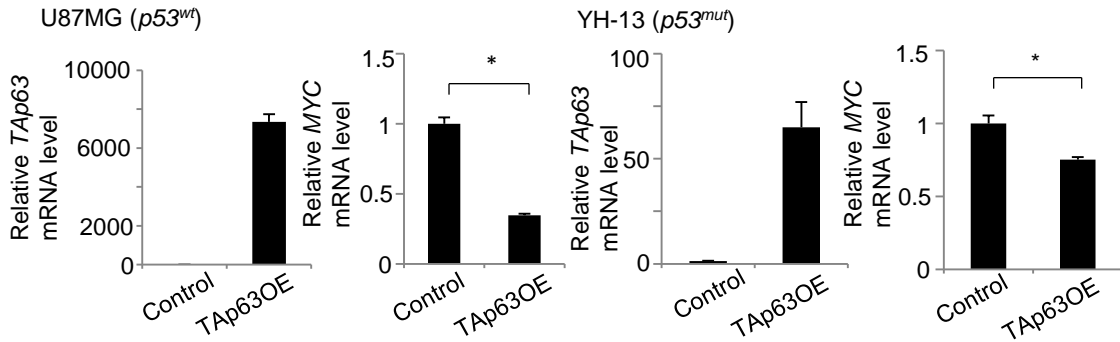

## Supplementary Figure 5

MYC levels are affected by *TAp63* expression.

a) qRT-PCR analysis of relative *MYC* expression in U87MG and YH-13 cells after siRNA-mediated knockdown of *TAp63*, normalized by *ACTB*. \* $P < 0.005$ , \*\* $P < 0.0005$  by two-tailed *t*-test.

b) qRT-PCR analysis of relative *MYC* expression in U87MG and YH-13 cells after lentiviral *TAp63* overexpression (TAp63OE), normalized by *ACTB*. \* $P < 0.005$  by two-tailed *t*-test.

## Supplementary Figure 6

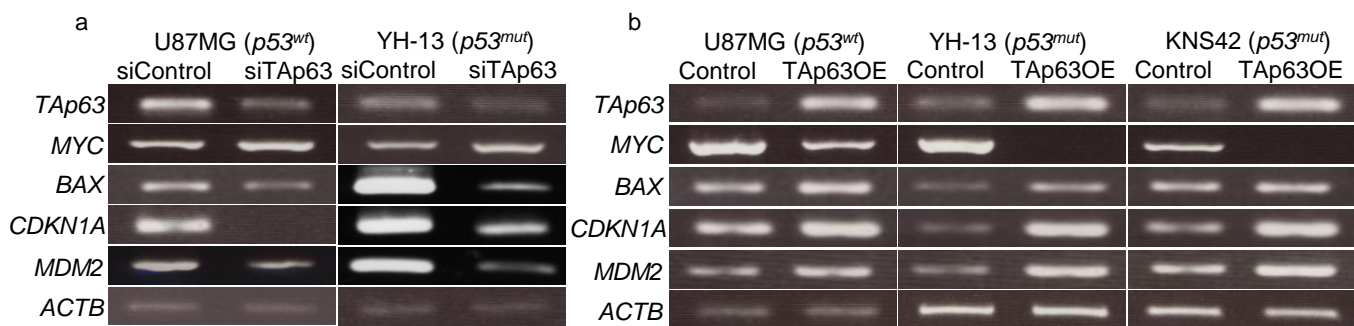

## Supplementary Figure 6

p53 downstream genes are regulated in a *TAp63*-dependent manner. RT-PCR analyses of p53 downstream target genes (*BAX*, *CDKN1A* and *MDM2*) in (a) *TAp63* siRNA-transfected cells and (b) *TAp63*-overexpressing cells after lentivirus infection. *ACTB* was used for internal control.



## Supplementary Figure 7

a

U87MG ( $p53^{wt}$ )

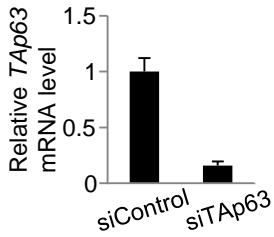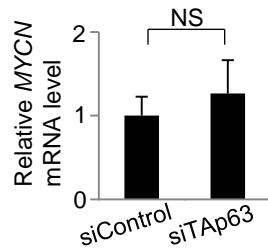

YH-13 ( $p53^{mut}$ )

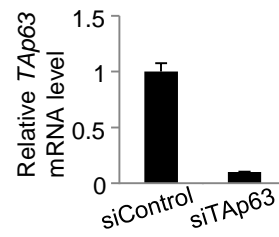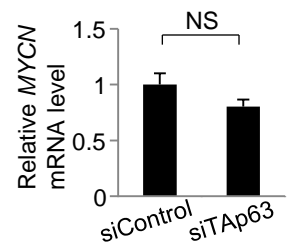

b

U87MG ( $p53^{wt}$ )

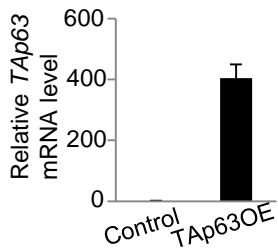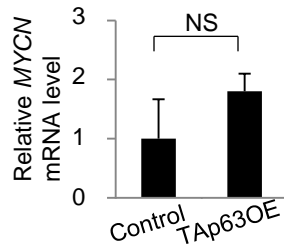

YH-13 ( $p53^{mut}$ )

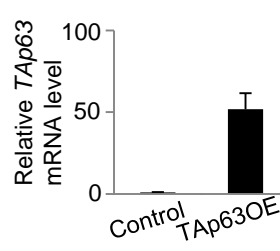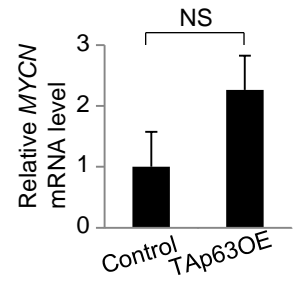

## Supplementary Figure 7

*MYCN* levels are not affected by *TAp63* expression.

a) qRT-PCR analysis of relative *MYCN* expression in U87MG and YH-13 cells after siRNA-mediated knockdown of *TAp63*, normalized by *ACTB*. NS, not significant, by two-tailed *t*-test.

b) qRT-PCR analysis of relative *MYCN* expression in U87MG and YH-13 cells after lentiviral *TAp63* overexpression (TAp63OE), normalized by *ACTB*. NS, not significant, by two-tailed *t*-test.

## Supplementary Figure 8

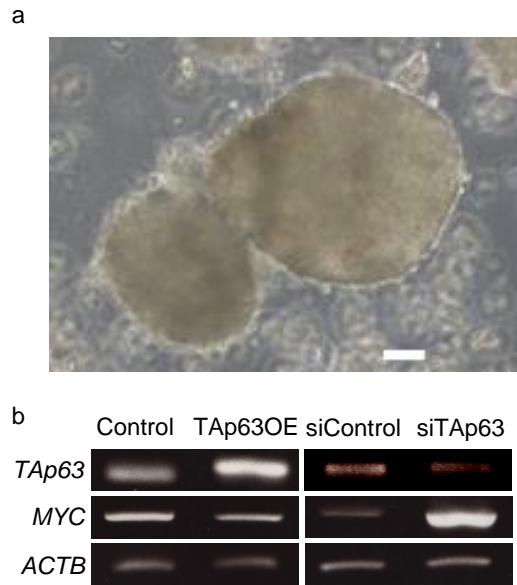

## Supplementary Figure 8

TAp63-MYC pathway was intact in the cancer tissue-derived spheroids (CTOS).

a) Representative images of CTOS with RT-PCR analysis of overexpressed or knocked-down *TAp63*. Scale bar, 40  $\mu\text{m}$ .

b) RT-PCR analyses of *TAp63*, *MYC* and  $\beta$ -*actin* in *TAp63* siRNA-transfected CTOS and *TAp63*-overexpressing CTOS after lentivirus infection. *ACTB* was used for internal control.

**Supplementary Figure 9**

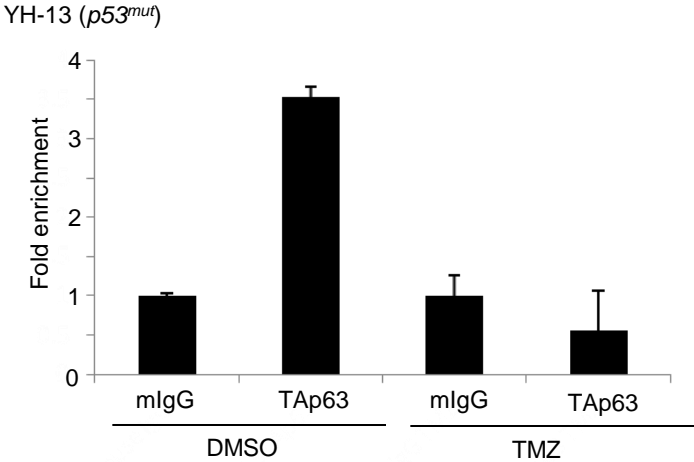

**Supplementary Figure 9**

ChIP-qPCR analyses of the amount of TAp63 recruited onto the *MYC* intron (R3).

### Supplementary Figure 10

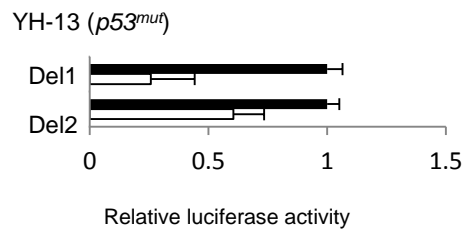

### Supplementary Figure 10

Luciferase activity of *MYC* promoter reporters after *TA63* overexpression in YH-13 cells. Data shown as the relative activity of the firefly luciferase compared with that in control YH-13 cells.

## Supplementary Figure 11

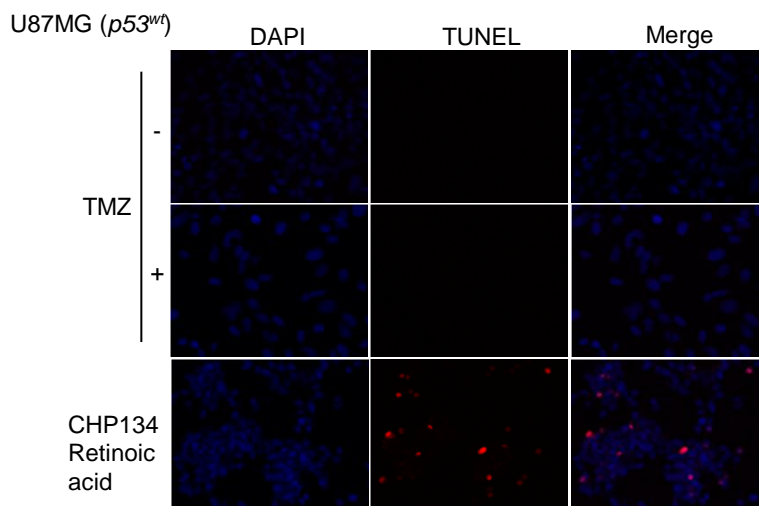

### Supplementary Figure11

TMZ suppresses invasion of U87MG cell lines by day 5 of exposure without inducing apoptosis. TUNEL assay revealing no apoptotic cells in the control and TMZ-treated U87MG cells. CHP134 cells treated with 5  $\mu$ M retinoic acid for 48 h served as a positive control.

## Supplementary Figure 12

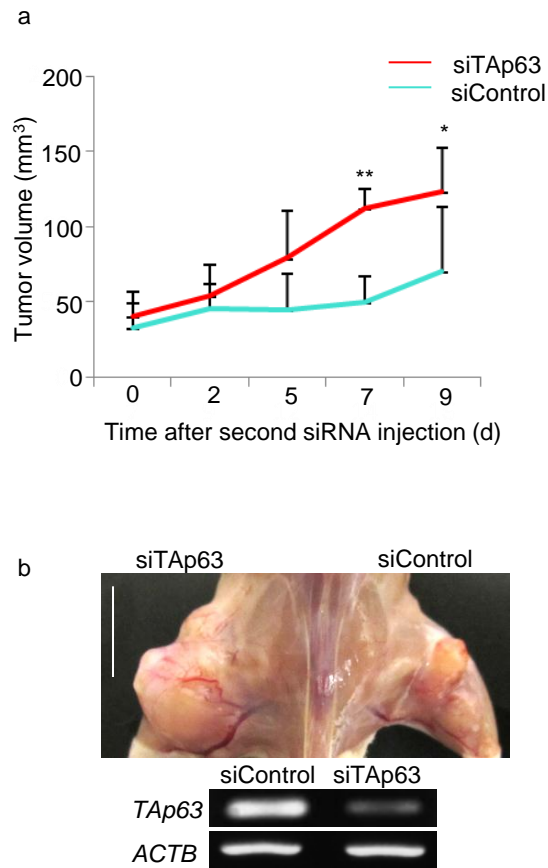

## Supplementary Figure 12

*TAp63* functions as a tumor suppressor in GBM *in vivo*.

a) U87MG cells were inoculated into the hind legs of mice and *TAp63* knockdown was performed by injecting small interference RNA (siRNA) against *TAp63* (siTAp63) into the palpable tumors once a week. Data are representative of two independent experiments. \*  $P=0.0483$ , \*\*  $P=0.0002$  by two-tailed *t*-tests ( $n=5$ ).

b) Representative photographs of subcutaneous xenograft tumors derived from siControl- and siTAp63-transfected U87MG cells. Corresponding RT-PCR analysis of xenograft-derived RNA. Scale bar, 10 mm.

### Supplementary Figure 13

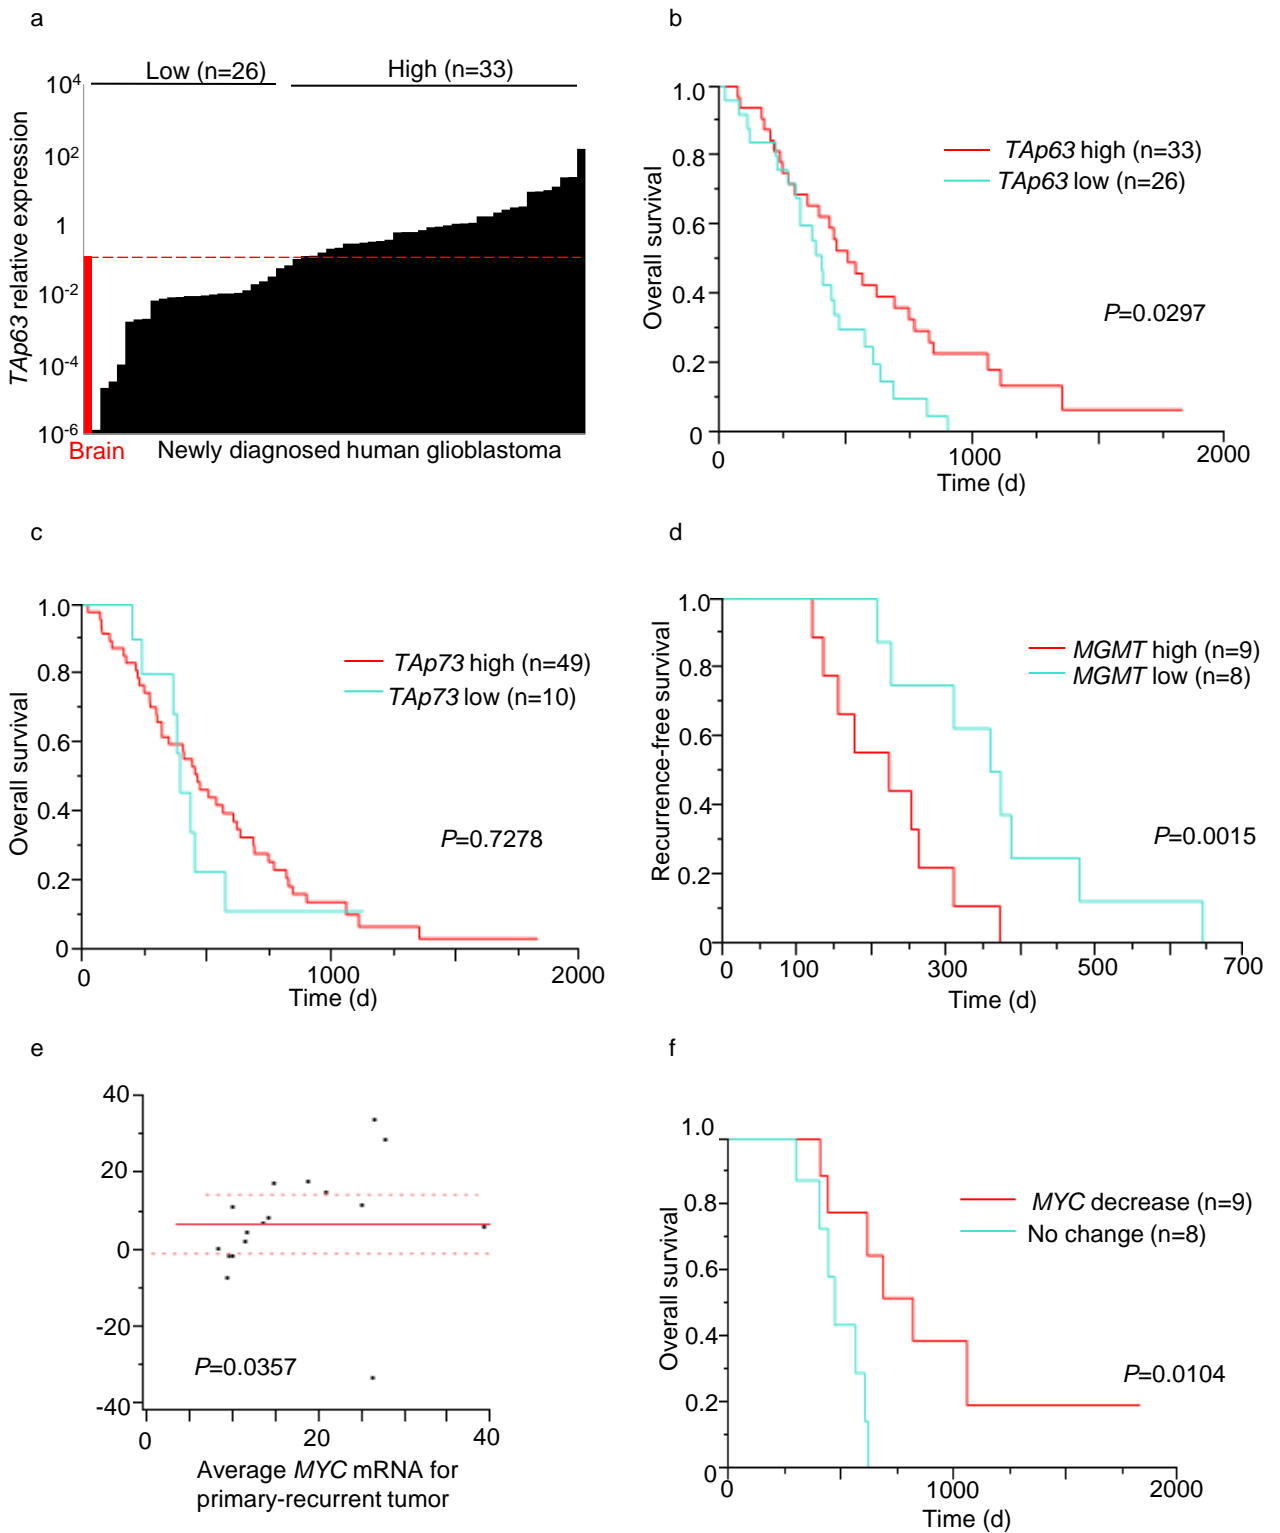

### Supplementary Figure 13

*TAp63* expression and *MYC* suppression are good prognosis factors in only GBM samples.

qRT-PCR for *TAp63* (a, b), *TAp73* (c), *MGMT* (d) and *MYC* (e, f)

## Supplementary Materials

### Primer sequences

#### RT-PCR

*TAp63*-sense GACCTGAGTGACCCCATGTG  
*TAp63*-antisense GAGGAGCCGTTCTGAATCTG  
*TAp63 $\alpha$* -sense GTCCCAGAGCACACAGACAA  
*TAp63 $\alpha$* -antisense CACTCCCCCTCCTCTTTGAT  
*TAp63 $\beta$* -sense GTCCCAGAGCACACAGACAA  
*TAp63 $\beta$* -antisense AGACTTGCCAGATCCTGACAATGCT  
*TAp63 $\gamma$* -sense GTCCCAGAGCACACAGACAA  
*TAp63 $\gamma$* -antisense CGGGGCTCCACAAGCTCATTC  
*MYC*-sense AGAGAAGCTGGCCTCCTACC  
*MYC*-antisense CGCCTCTTGACATTCTCCTC  
*CDKN1A*-sense ATGAAATTCACCCCCTTTCC  
*CDKN1A*-antisense CCCTAGGCTGTGCTCACTTC  
*BAX*-sense AGAGGATGATTGCCGCCGT  
*BAX*-antisense CAACCACCCTGGTCTTGGAT  
*MDM2*-sense GGTGGGAGTGATCAAAAGGA  
*MDM2*-antisense ACACAGAGCCAGGCTTTCAT  
*ACTB* -sense CAAGAGATGGCCACGGCTGCT  
*ACTB* -antisense TCCTTCTGCATCCTGTCCGGCA

#### qRT-PCR

*MYC*-sense AGGGTCAAGTTGGACAGTGTC  
*MYC*-antisense TGGTGCATTTTCGGTTGTTG  
*MYCN*-sense CCTTCGGTCCAGCTTTCTCA  
*MYCN*-antisense GGCCTTCTCATTCTTTACCAACTC  
*TP53*-sense GCCTGAGGTTGGCTCTGACT  
*TP53*-antisense CCATGCAGGAACTGTTACACATG  
*TAp63*-sense TGGTGCGACAAACAAGATTG  
*TAp63*-antisense ATAGGGACTGGTGGACGAGG  
 $\Delta$ *Np63*-sense CAATGCCAGACTCAATTTAGTG  
 $\Delta$ *Np63*-antisense TGCTGGTCCATGCTGTTTCCAG  
*TAp73*-sense CACCACGTTTGAGCACCTC  
*TAp73*-antisense TGCTCAGCAGATTGAACTGG  
 $\Delta$ *Np73*-sense AAAAGCGAAAATGCCAACAAA  
 $\Delta$ *Np73*-antisense AGAGGCTCCGCAGCTAGTGA



*MGMT*-sense CCGTTTGCGACTTGGTACTTG

*MGMT*-antisense CCAGTGTGGTGC GTTTCATT

### **ChIP-PCR assay**

R1-sense TAAAATGCCTTTGGGTGAGG

R1-antisense GCCCCACACATGATTTGTTT

R2-sense CCCTTTATAATGCGAGGGTCT

R2-antisense TGCCTCTCGCTGGAATTACT

R3-sense CTTGGAGTAGGGACCGCATA

R3-antisense AAAAGCCAAATGCCAACTTC

R4-sense AGCGACTCTGGTAAGCGAAG

R4-antisens AAACGCTAAAGCCCAAGTT

*GAPDH*-sense TTCCCTCTTCTTGACTCACC

*GAPDH*-antisense CACAAAGGCACTCCTGGAAA

### **ChIP-qPCR assay**

R1-sense TGCTATACACGCACCCCTTTC

R1-antisense TCCCTCCACCACCTCCAA

R3-sense TTTGCGGTGGGCAGAAA

R3-antisense GCGGTCCCTACTCCAAGGA
